# Supplementary material
Source: Springer Nature journal article supplement (http://www.nature.com/leu/journal/v22/n3/extref/2404922x2.pdf)

Ringshausen et al  
Supplement Figure 1

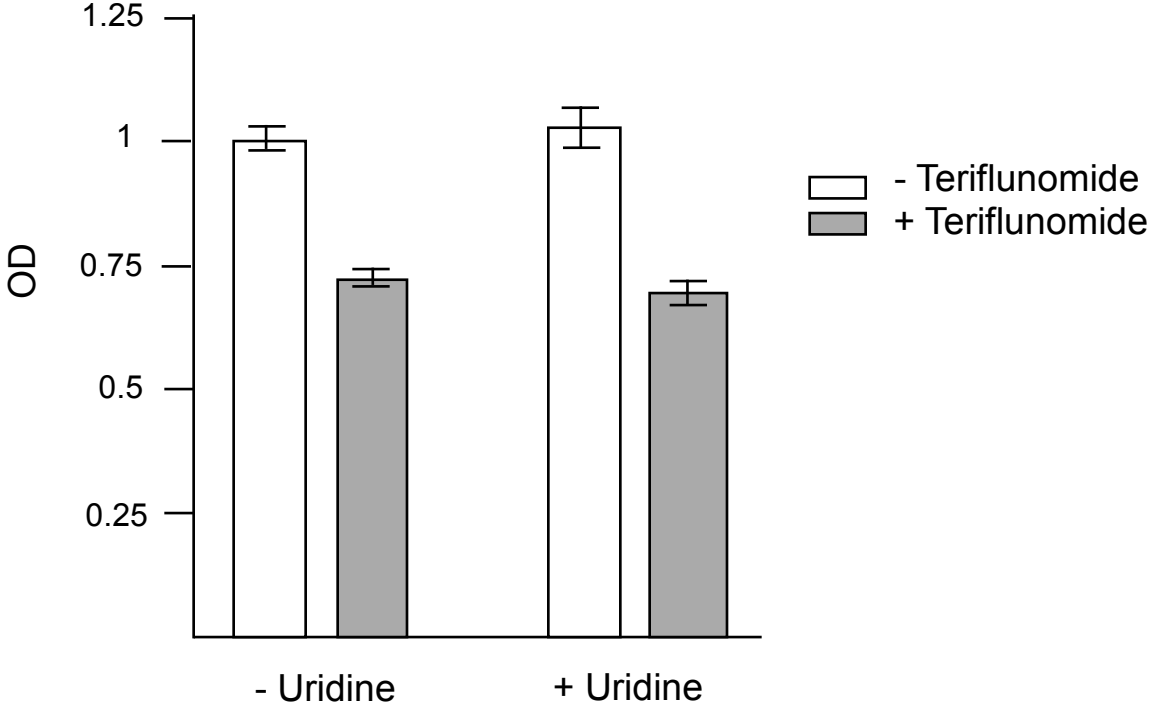

Supplement: 2404922x2.pdf [file 2404922x2.pdf]
